# Supplementary material for: Bringing a health systems modelling approach to complex evaluations: multicountry applications in HIV, TB and malaria
Source: PubMed Central journal article supplement — BMJ Glob Health. 2020 Nov 3;5(11):e002441. doi: 10.1136/bmjgh-2020-002441 (PMC7640497; doi:10.1136/bmjgh-2020-002441), 2020-11-03
Supplement: bmjgh-2020-002441supp001.pdf [file bmjgh-2020-002441supp001.pdf]

## APPENDIX 1. GLOBAL AND COUNTRY EVALUATION PARTNERS OF THE PROSPECTIVE COUNTRY EVALUATION

The Prospective Country Evaluation (PCE) is an independent evaluation of the functioning of Global Fund interventions and the policies and strategies employed by the Global Fund and principal recipients to deliver them in eight countries.<sup>1</sup> Commissioned by the Technical Evaluation Reference Group (TERG) of the Global Fund in 2017, the PCE uses a mixture of quantitative and qualitative methods to understand and course-correct Global Fund grants in near-real-time. The PCE is structured with two global evaluation partners (GEPs), or international organizations charged with coordinating and synthesizing findings between countries, and eight country evaluation partners (CEPs) who interview stakeholders, analyze data, identify finding statements and disseminate results in-country. Each GEP oversees four countries:

- The Institute for Health Metrics and Evaluation (IHME) is a research institute based at the University of Washington in Seattle, USA. IHME has partnered with PATH (see next) to form one of the two GEPs in the PCE, leading the evaluations in DRC, Guatemala, Senegal and Uganda.
  - PATH is an international nonprofit organization specializing in global health based in Seattle, USA with additional offices in several locations around the world. IHME and PATH's Seattle office are partners in the PCE to form one GEP.
  - PATH's Kinshasa office is the CEP in DRC.
  - El Centro de Investigación Epidemiológica en Salud Sexual y Reproductiva (CIESAR) is a nonprofit public health institute based in Guatemala City, and the CEP in Guatemala.
  - l'Institut Santé et Développement is a public health research institute at Université Cheikh Anta DIOP in Dakar, and the CEP in Senegal.
  - The Infectious Disease Research Collaboration is a nonprofit research institute based in Kampala, and the CEP in Uganda.
- 
- Euro Health Group (EHG) is a health consultancy company based in Denmark. EHG has partnered with the University of California, San Francisco (see next) to form the other of the two GEPs in the PCE, leading evaluations in Cambodia, Mozambique, Myanmar and Sudan.
  - The University of California, San Francisco (UCSF) is a public research university in San Francisco, USA. EHG and UCSF are partners in the PCE to form one GEP.
  - The EHG and UCSF GEP works with CEPs in four countries: Cambodia, Mozambique, Myanmar and Sudan.

---

<sup>1</sup> <https://www.theglobalfund.org/en/technical-evaluation-reference-group/prospective-country-evaluations/>
