# Supplementary material for: Bringing a health systems modelling approach to complex evaluations: multicountry applications in HIV, TB and malaria
Source: PubMed Central journal article supplement — BMJ Glob Health. 2020 Nov 3;5(11):e002441. doi: 10.1136/bmjgh-2020-002441 (PMC7640497; doi:10.1136/bmjgh-2020-002441), 2020-11-03
Supplement: bmjgh-2020-002441supp002.pdf [file bmjgh-2020-002441supp002.pdf]

## APPENDIX 2. DIAGRAMS AND INDICATORS IN CONCEPTUAL FRAMEWORKS

Frameworks for HIV, TB and malaria were developed using the Evaluation Planning Tool available at <https://www.radar-project.org/evaluation-planning-tool>.

### HIV

#### Diagram

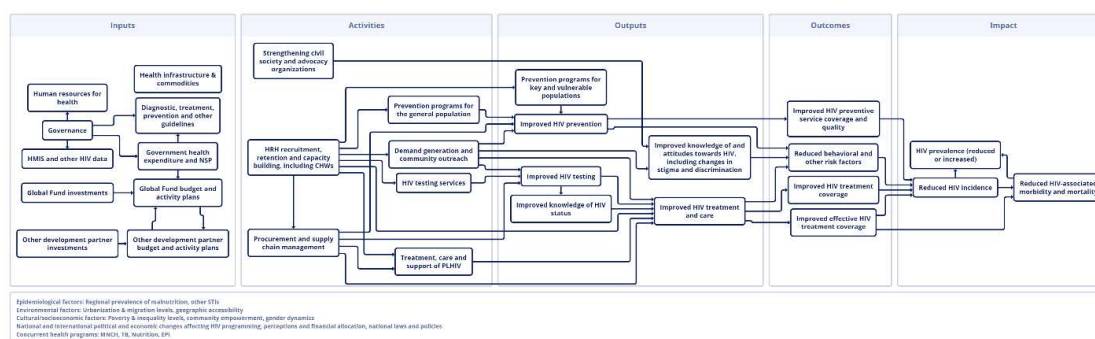

#### List of Indicators and Elements

| Indicator                                                                                                   | Measurement of                                                   | Level      |
|-------------------------------------------------------------------------------------------------------------|------------------------------------------------------------------|------------|
| <b>Distribution of health workers</b>                                                                       | HRH recruitment, retention and capacity building, including CHWs | Activities |
| <b>Number of ARV doses distributed</b>                                                                      | Procurement and supply chain management                          | Activities |
| <b>Number of ARV doses distributed</b>                                                                      | Treatment, care and support of PLHIV                             | Activities |
| <b>Number of community-led advocacy sessions</b>                                                            | Demand generation and community outreach                         | Activities |
| <b>Number of health workers per 10,000 population</b>                                                       | HRH recruitment, retention and capacity building, including CHWs | Activities |
| <b>Number of USD budgeted and spent on human rights-related interventions and activities</b>                | Strengthening civil society and advocacy organizations           | Activities |
| <b>Number of USD budgeted and spent on interventions and activities specific to women and girls</b>         | Strengthening civil society and advocacy organizations           | Activities |
| <b>Percentage of ART sites that had a stock-out of any antiretroviral drugs during the reporting period</b> | Procurement and supply chain management                          | Activities |
| <b>Percentage of consignments delivered on time and in full</b>                                             | Procurement and supply chain management                          | Activities |
| <b>Percentage of consignments delivered on time and in full</b>                                             | Procurement and supply chain management                          | Activities |

|                                                                                                      |                                                                  |            |
|------------------------------------------------------------------------------------------------------|------------------------------------------------------------------|------------|
| <b>Percentage of HIV health facilities with diagnostic capabilities</b>                              | HIV testing services                                             | Activities |
| <b>Percentage of procurement volume at or below benchmark</b>                                        | Procurement and supply chain management                          | Activities |
| <b>Proportion of facility reports received over the reports expected during the reporting period</b> | HRH recruitment, retention and capacity building, including CHWs | Activities |
| <b>Case-fatality per HIV case</b>                                                                    | Reduced HIV-associated morbidity and mortality                   | Impact     |
| <b>Fraction of All Deaths due to HIV/AIDS</b>                                                        | Reduced HIV-associated morbidity and mortality                   | Impact     |
| <b>HIV Incidence in women aged 15-24</b>                                                             | Reduced HIV incidence                                            | Impact     |
| <b>Number of AIDS-related deaths per 100,000 population</b>                                          | Reduced HIV-associated morbidity and mortality                   | Impact     |
| <b>Number of new and relapse TB cases among PLHIV per 1,000 person-years</b>                         | Reduced HIV-associated morbidity and mortality                   | Impact     |
| <b>Number of new HIV cases per 100,000</b>                                                           | Reduced HIV incidence                                            | Impact     |
| <b>Number of new pediatric HIV cases per 1,000 deliveries</b>                                        | Reduced HIV incidence                                            | Impact     |
| <b>Percentage of men who have sex with men who are living with HIV</b>                               | HIV prevalence (reduced or increased)                            | Impact     |
| <b>Percentage of PLHIV diagnosed with TB in care and treatment settings</b>                          | Reduced HIV-associated morbidity and mortality                   | Impact     |
| <b>Percentage of sex workers who are living with HIV</b>                                             | HIV prevalence (reduced or increased)                            | Impact     |
| <b>Percentage of transgender people who are living with HIV</b>                                      | HIV prevalence (reduced or increased)                            | Impact     |
| <b>Proportion of key and vulnerable populations living with HIV</b>                                  | HIV prevalence (reduced or increased)                            | Impact     |
| <b>Proportion of population living with HIV</b>                                                      | HIV prevalence (reduced or increased)                            | Impact     |
| <b>TB/HIV mortality rate per 100,000 population</b>                                                  | Reduced HIV-associated morbidity and mortality                   | Impact     |
| <b>Distribution of health facilities</b>                                                             | Health infrastructure & commodities                              | Inputs     |
| <b>Distribution of health workers</b>                                                                | Human resources for health                                       | Inputs     |
| <b>Number of health facilities per 10,000 population</b>                                             | Health infrastructure & commodities                              | Inputs     |
| <b>Number of health workers per 10,000 population</b>                                                | Human resources for health                                       | Inputs     |
| <b>Number of USD budgeted and spent on HIV testing services interventions and activities</b>         | Global Fund budget and activity plans                            | Inputs     |
| <b>Number of USD budgeted and spent on other program interventions and activities</b>                | Other development partner budget and activity plans              | Inputs     |
| <b>Number of USD budgeted and spent on other program interventions and activities</b>                | Government health expenditure and NSP                            | Inputs     |
| <b>Number of USD budgeted and spent on performance based financing interventions and activities</b>  | Global Fund budget and activity plans                            | Inputs     |

|                                                                                                                                             |                                                     |          |
|---------------------------------------------------------------------------------------------------------------------------------------------|-----------------------------------------------------|----------|
| <b>Number of USD budgeted and spent on PMTCT interventions and activities</b>                                                               | Global Fund budget and activity plans               | Inputs   |
| <b>Number of USD budgeted and spent on prevention interventions and activities</b>                                                          | Government health expenditure and NSP               | Inputs   |
| <b>Number of USD budgeted and spent on prevention interventions and activities</b>                                                          | Global Fund budget and activity plans               | Inputs   |
| <b>Number of USD budgeted and spent on prevention interventions and activities</b>                                                          | Other development partner budget and activity plans | Inputs   |
| <b>Number of USD budgeted and spent on program management interventions and activities</b>                                                  | Global Fund budget and activity plans               | Inputs   |
| <b>Number of USD budgeted and spent on programs to reduce human rights-related barriers to HIV services interventions and activities</b>    | Global Fund budget and activity plans               | Inputs   |
| <b>Number of USD budgeted and spent on RSSH interventions and activities</b>                                                                | Global Fund budget and activity plans               | Inputs   |
| <b>Number of USD budgeted and spent on RSSH interventions and activities</b>                                                                | Other development partner budget and activity plans | Inputs   |
| <b>Number of USD budgeted and spent on RSSH interventions and activities</b>                                                                | Government health expenditure and NSP               | Inputs   |
| <b>Number of USD budgeted and spent on TB/HIV interventions and activities</b>                                                              | Global Fund budget and activity plans               | Inputs   |
| <b>Number of USD budgeted and spent on treatment, care and support interventions and activities</b>                                         | Global Fund budget and activity plans               | Inputs   |
| <b>Number of USD budgeted and spent on treatment, care and support interventions and activities</b>                                         | Other development partner budget and activity plans | Inputs   |
| <b>Number of USD budgeted and spent on treatment, care and support interventions and activities</b>                                         | Government health expenditure and NSP               | Inputs   |
| <b>Number of USD disbursed from Global Fund to PR</b>                                                                                       | Global Fund investments                             | Inputs   |
| <b>Number of USD disbursed from other development partners to PR</b>                                                                        | Other development partner investments               | Inputs   |
| <b>Percent of country allocation invested in programs targeting gender and human rights-related barriers to health care access</b>          | Global Fund budget and activity plans               | Inputs   |
| <b>Percent of country allocation invested in programs targeting key populations and human rights-related barriers to health care access</b> | Global Fund budget and activity plans               | Inputs   |
| <b>Percent of country allocation invested in programs that target scale-up of services for women and adolescent girls</b>                   | Global Fund budget and activity plans               | Inputs   |
| <b>Frequency of commercial sex work patronage per 100,000 person-years</b>                                                                  | Reduced behavioral and other risk factors           | Outcomes |
| <b>Frequency of unprotected sexual occurrences per 100,000 person-years</b>                                                                 | Reduced behavioral and other risk factors           | Outcomes |
| <b>Number of needles and syringes distributed per person who injects drugs per year by needle and syringe programs</b>                      | Reduced behavioral and other risk factors           | Outcomes |

|                                                                                                                                                                                            |                                                      |          |
|--------------------------------------------------------------------------------------------------------------------------------------------------------------------------------------------|------------------------------------------------------|----------|
| <b>Number of people receiving post-exposure prophylaxis per 100,000</b>                                                                                                                    | Improved HIV preventive service coverage and quality | Outcomes |
| <b>Number of sexual partners in previous year per 100,000 person-years</b>                                                                                                                 | Reduced behavioral and other risk factors            | Outcomes |
| <b>Number of women who regularly use female contraceptives per 100,000</b>                                                                                                                 | Reduced behavioral and other risk factors            | Outcomes |
| <b>Percentage of adults and children with HIV known to be on treatment 12 months after initiation of antiretroviral therapy</b>                                                            | Improved HIV treatment coverage                      | Outcomes |
| <b>Percentage of HIV-positive pregnant women who received antiretroviral therapy during pregnancy</b>                                                                                      | Improved HIV treatment coverage                      | Outcomes |
| <b>Percentage of individuals receiving opioid substitution therapy who received treatment for at least six months</b>                                                                      | Reduced behavioral and other risk factors            | Outcomes |
| <b>Percentage of key and vulnerable populations reached with HIV prevention programs - defined package of services</b>                                                                     | Improved HIV preventive service coverage and quality | Outcomes |
| <b>Percentage of key and vulnerable populations using pre-exposure prophylaxis in priority populations</b>                                                                                 | Improved HIV preventive service coverage and quality | Outcomes |
| <b>Percentage of men who have sex with men reached with HIV prevention programs- defined package of services</b>                                                                           | Improved HIV preventive service coverage and quality | Outcomes |
| <b>Percentage of orphaned and other vulnerable children aged 0-17 years whose households received free basic external support in caring for the child according to national guidelines</b> | Reduced behavioral and other risk factors            | Outcomes |
| <b>Percentage of other vulnerable populations reached with HIV prevention programs- defined package of services</b>                                                                        | Improved HIV preventive service coverage and quality | Outcomes |
| <b>Percentage of other vulnerable populations that have received an HIV test during the reporting period and know their results</b>                                                        | Improved HIV preventive service coverage and quality | Outcomes |
| <b>Percentage of people living with HIV currently receiving antiretroviral therapy</b>                                                                                                     | Improved HIV treatment coverage                      | Outcomes |
| <b>Percentage of people who inject drugs reached with HIV prevention programs- defined package of services</b>                                                                             | Improved HIV preventive service coverage and quality | Outcomes |
| <b>Percentage of PLHIV from key and vulnerable populations currently receiving ART</b>                                                                                                     | Improved HIV treatment coverage                      | Outcomes |
| <b>Percentage of sex workers reached with HIV prevention programs- defined package of services</b>                                                                                         | Improved HIV preventive service coverage and quality | Outcomes |
| <b>Percentage of transgender people reached with HIV prevention programs- defined package of services</b>                                                                                  | Improved HIV preventive service coverage and quality | Outcomes |
| <b>Proportion of ever-married or partnered women aged 15-49 who experienced physical or sexual violence from a male intimate partner in the past 12 months</b>                             | Reduced behavioral and other risk factors            | Outcomes |
| <b>Viral load suppression per 1,000 patients on ART</b>                                                                                                                                    | Improved effective HIV treatment coverage            | Outcomes |

|                                                                                                                                                                                              |                                                                                                 |          |
|----------------------------------------------------------------------------------------------------------------------------------------------------------------------------------------------|-------------------------------------------------------------------------------------------------|----------|
| <b>Viral load suppression per 1,000 PLHIV</b>                                                                                                                                                | Improved effective HIV treatment coverage                                                       | Outcomes |
| <b>Women's participation in household decisions</b>                                                                                                                                          | Reduced behavioral and other risk factors                                                       | Outcomes |
| <b>Number of adolescent girls and young women who were tested for HIV and received their results during the reporting period</b>                                                             | Improved HIV testing                                                                            | Outputs  |
| <b>Number of community outreach sessions performed</b>                                                                                                                                       | Improved HIV prevention                                                                         | Outputs  |
| <b>Number of condoms distributed</b>                                                                                                                                                         | Improved HIV prevention                                                                         | Outputs  |
| <b>Number of individuals counseled</b>                                                                                                                                                       | Improved HIV treatment and care                                                                 | Outputs  |
| <b>Number of medical male circumcisions performed according to national standards</b>                                                                                                        | Improved HIV prevention                                                                         | Outputs  |
| <b>Number of patients in need reached through community health network (patients on ART lost to follow-up) that are not reached through the health facility defaulter tracking mechanism</b> | Improved HIV testing                                                                            | Outputs  |
| <b>Number of people who were tested for HIV</b>                                                                                                                                              | Improved HIV testing                                                                            | Outputs  |
| <b>Number of post-exposure prophylaxis ARV doses distributed</b>                                                                                                                             | Improved HIV prevention                                                                         | Outputs  |
| <b>Number of pre-exposure prophylaxis ARV doses distributed</b>                                                                                                                              | Improved HIV prevention                                                                         | Outputs  |
| <b>Number of pregnant women tested for HIV</b>                                                                                                                                               | Improved HIV testing                                                                            | Outputs  |
| <b>Number of serodiscordant couples counseled</b>                                                                                                                                            | Improved HIV prevention                                                                         | Outputs  |
| <b>Percentage of adolescent girls and young women reached with HIV prevention programs "defined package of services"</b>                                                                     | Improved HIV prevention                                                                         | Outputs  |
| <b>Percentage of currently married women who usually make a decision about their own healthcare, either by themselves or jointly with their husbands</b>                                     | Improved knowledge of and attitudes towards HIV, including changes in stigma and discrimination | Outputs  |
| <b>Percentage of HIV-exposed infants receiving a virological test for HIV within two months of birth</b>                                                                                     | Improved HIV testing                                                                            | Outputs  |
| <b>Percentage of key and vulnerable populations who have received an HIV test and know their HIV status</b>                                                                                  | Improved knowledge of HIV status                                                                | Outputs  |
| <b>Percentage of men who have sex with men that have received an HIV test during the reporting period and know their results</b>                                                             | Improved knowledge of HIV status                                                                | Outputs  |
| <b>Percentage of newly diagnosed key and vulnerable populations linked to HIV care</b>                                                                                                       | Improved HIV treatment and care                                                                 | Outputs  |
| <b>Percentage of newly diagnosed PLHIV initiating ART</b>                                                                                                                                    | Improved HIV treatment and care                                                                 | Outputs  |
| <b>Percentage of people living with HIV in care (including PMTCT) who are screened for TB in HIV care or treatment settings</b>                                                              | Improved HIV treatment and care                                                                 | Outputs  |
| <b>Percentage of people living with HIV who experienced recent discrimination at health care facilities</b>                                                                                  | Improved knowledge of and attitudes towards HIV,                                                | Outputs  |

|                                                                                                                                |                                                                                                 |         |
|--------------------------------------------------------------------------------------------------------------------------------|-------------------------------------------------------------------------------------------------|---------|
|                                                                                                                                | including changes in stigma and discrimination                                                  |         |
| <b>Percentage of people who have heard of HIV and know how HIV can be prevented</b>                                            | Improved knowledge of and attitudes towards HIV, including changes in stigma and discrimination | Outputs |
| <b>Percentage of people who inject drugs that have received an HIV test during the reporting period and know their results</b> | Improved knowledge of HIV status                                                                | Outputs |
| <b>Percentage of PLHIV who have received an HIV test and know their HIV status</b>                                             | Improved knowledge of HIV status                                                                | Outputs |
| <b>Percentage of pregnant women who have received an HIV test and know their HIV status</b>                                    | Improved knowledge of HIV status                                                                | Outputs |
| <b>Percentage of sex workers that have received an HIV test during the reporting period and know their results</b>             | Improved knowledge of HIV status                                                                | Outputs |
| <b>Percentage of women and men aged 15-49 who report discriminatory attitudes towards people living with HIV</b>               | Improved knowledge of and attitudes towards HIV, including changes in stigma and discrimination | Outputs |
| <b>Percentage of women and men who agree that a wife does not have the right to refuse sex with her husband</b>                | Improved knowledge of and attitudes towards HIV, including changes in stigma and discrimination | Outputs |
| <b>Percentage of women who have heard of HIV and know how to prevent mother-to-child transmission</b>                          | Improved knowledge of and attitudes towards HIV, including changes in stigma and discrimination | Outputs |
| <b>Percentage of women who have input into decisions over how household financial assets are used</b>                          | Improved knowledge of and attitudes towards HIV, including changes in stigma and discrimination | Outputs |
| <b>Percentage of young people aged 10-24 years reached by life skills-based HIV education in schools</b>                       | Improved knowledge of and attitudes towards HIV, including changes in stigma and discrimination | Outputs |

TB



## Diagram

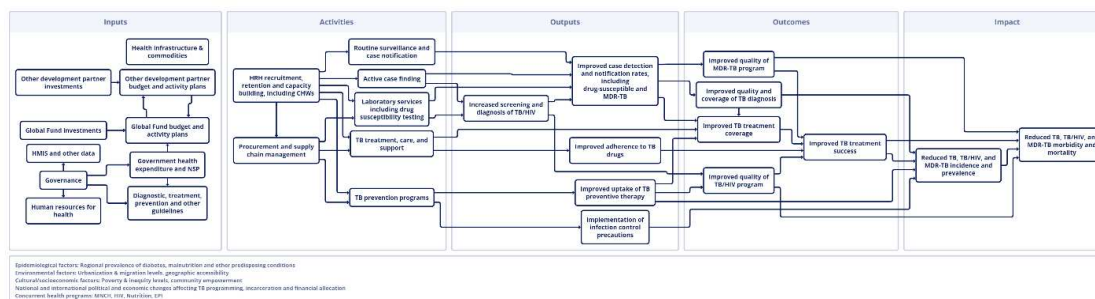

## List of Indicators and Elements

| Indicator                                                                                                                               | Measurement of                                                   | Level      |
|-----------------------------------------------------------------------------------------------------------------------------------------|------------------------------------------------------------------|------------|
| <b>Distribution of health workers</b>                                                                                                   | HRH recruitment, retention and capacity building, including CHWs | Activities |
| <b>Number of health workers per 10,000 population</b>                                                                                   | HRH recruitment, retention and capacity building, including CHWs | Activities |
| <b>Number of notified TB cases (all forms) contributed by non-national TB program providers and community referrals</b>                 | Laboratory services including drug susceptibility testing        | Activities |
| <b>Percentage of laboratories with smear microscopy during the reporting period participating in external quality assurance program</b> | Laboratory services including drug susceptibility testing        | Activities |
| <b>Percentage of new and relapse TB patients tested using WHO recommended rapid tests at the time of diagnosis</b>                      | Procurement and supply chain management                          | Activities |
| <b>Percentage of reporting units that reported a stock-out of anti-TB drugs</b>                                                         | Procurement and supply chain management                          | Activities |
| <b>Percentage of TB-affected families facing catastrophic costs due to TB</b>                                                           | Reduced TB, TB/HIV, and MDR-TB morbidity and mortality           | Impact     |
| <b>Proportion of new TB cases with RR-TB and/or MDR-TB</b>                                                                              | Reduced TB, TB/HIV, and MDR-TB morbidity and mortality           | Impact     |
| <b>TB incidence rate per 100,000</b>                                                                                                    | Reduced TB, TB/HIV, and MDR-TB morbidity and mortality           | Impact     |
| <b>TB mortality rate per 100,000</b>                                                                                                    | Reduced TB, TB/HIV, and MDR-TB morbidity and mortality           | Impact     |
| <b>TB prevalence ratio per 100,000</b>                                                                                                  | Reduced TB, TB/HIV, and MDR-TB morbidity and mortality           | Impact     |
| <b>TB/HIV mortality rate per 100,000 population</b>                                                                                     | Reduced TB, TB/HIV, and MDR-TB morbidity and mortality           | Impact     |
| <b>Global Fund budget for TB as a fraction of total health expenditure for TB</b>                                                       | Global Fund budget and activity plans                            | Inputs     |
| <b>Number of USD budgeted and spent on HIV/TB interventions and activities</b>                                                          | Global Fund budget and activity plans                            | Inputs     |

|                                                                                                                                                        |                                                     |          |
|--------------------------------------------------------------------------------------------------------------------------------------------------------|-----------------------------------------------------|----------|
| <b>Number of USD budgeted and spent on HIV/TB interventions and activities</b>                                                                         | Other development partner budget and activity plans | Inputs   |
| <b>Number of USD budgeted and spent on HIV/TB interventions and activities</b>                                                                         | Government health expenditure and NSP               | Inputs   |
| <b>Number of USD budgeted and spent on MDR TB interventions and activities</b>                                                                         | Global Fund budget and activity plans               | Inputs   |
| <b>Number of USD budgeted and spent on MDR TB interventions and activities</b>                                                                         | Other development partner budget and activity plans | Inputs   |
| <b>Number of USD budgeted and spent on MDR-TB interventions and activities</b>                                                                         | Government health expenditure and NSP               | Inputs   |
| <b>Number of USD budgeted and spent on other program interventions and activities</b>                                                                  | Global Fund budget and activity plans               | Inputs   |
| <b>Number of USD budgeted and spent on other program interventions and activities</b>                                                                  | Government health expenditure and NSP               | Inputs   |
| <b>Number of USD budgeted and spent on other program interventions and activities</b>                                                                  | Other development partner budget and activity plans | Inputs   |
| <b>Number of USD budgeted and spent on RSSH interventions and activities</b>                                                                           | Global Fund budget and activity plans               | Inputs   |
| <b>Number of USD budgeted and spent on RSSH interventions and activities</b>                                                                           | Other development partner budget and activity plans | Inputs   |
| <b>Number of USD budgeted and spent on RSSH interventions and activities</b>                                                                           | Government health expenditure and NSP               | Inputs   |
| <b>Number of USD budgeted and spent on TB prevention interventions and activities</b>                                                                  | Government health expenditure and NSP               | Inputs   |
| <b>Number of USD budgeted and spent on TB prevention interventions and activities</b>                                                                  | Global Fund budget and activity plans               | Inputs   |
| <b>Number of USD budgeted and spent on TB prevention interventions and activities</b>                                                                  | Other development partner budget and activity plans | Inputs   |
| <b>Number of USD budgeted and spent on TB treatment, care and support interventions and activities</b>                                                 | Government health expenditure and NSP               | Inputs   |
| <b>Number of USD budgeted and spent on TB treatment, care and support interventions and activities</b>                                                 | Global Fund budget and activity plans               | Inputs   |
| <b>Number of USD budgeted and spent on TB treatment, care and support interventions and activities</b>                                                 | Other development partner budget and activity plans | Inputs   |
| <b>Number of USD disbursed from Global Fund to PRs</b>                                                                                                 | Global Fund investments                             | Inputs   |
| <b>Number of USD disbursed from other development partners to PR</b>                                                                                   | Other development partner investments               | Inputs   |
| <b>Total health expenditure for TB</b>                                                                                                                 | Governance                                          | Inputs   |
| <b>BCG doses administered</b>                                                                                                                          | Improved TB treatment success                       | Outcomes |
| <b>Case notification rate of all forms of TB per 100,000 population- bacteriologically confirmed plus clinically diagnosed, new and relapse cases.</b> | Improved quality and coverage of TB diagnosis       | Outcomes |
| <b>Number of cases of XDR-TB enrolled on treatment</b>                                                                                                 | Improved quality of MDR-TB program                  | Outcomes |



|                                                                                                                                                                                                                    |                                               |          |
|--------------------------------------------------------------------------------------------------------------------------------------------------------------------------------------------------------------------|-----------------------------------------------|----------|
| <b>Number of notified cases of all forms of TB (i.e. bacteriologically confirmed + clinically diagnosed) Includes new and relapse cases</b>                                                                        | Improved quality and coverage of TB diagnosis | Outcomes |
| <b>Number of TB cases (all forms) notified among key populations/high-risk groups (other than prisoners)</b>                                                                                                       | Improved quality and coverage of TB diagnosis | Outcomes |
| <b>Number of TB cases (all forms) notified among prisoners</b>                                                                                                                                                     | Improved quality and coverage of TB diagnosis | Outcomes |
| <b>Number of TB cases with Rifampicin-resistant (RR-TB) and/or MDR-TB notified</b>                                                                                                                                 | Improved quality of MDR-TB program            | Outcomes |
| <b>Percentage of cases with RR and/or MDR-TB successfully treated</b>                                                                                                                                              | Improved TB treatment success                 | Outcomes |
| <b>Percentage of cases with RR and/or MDR-TB successfully treated</b>                                                                                                                                              | Improved TB treatment success                 | Outcomes |
| <b>Percentage of cases with RR and/or MDR-TB successfully treated</b>                                                                                                                                              | Improved TB treatment success                 | Outcomes |
| <b>Percentage of cases with RR-TB and/or MDR-TB started on treatment for MDR-TB who were lost to follow-up during the first six months of treatment</b>                                                            | Improved quality of MDR-TB program            | Outcomes |
| <b>Percentage of confirmed MDR-TB cases tested for susceptibility to any fluoroquinolone and any second-line injectable drug</b>                                                                                   | Improved quality of MDR-TB program            | Outcomes |
| <b>Percentage of drug susceptibility testing laboratories showing adequate performance on external quality assurance</b>                                                                                           | Improved quality of MDR-TB program            | Outcomes |
| <b>Percentage of HIV-positive new and relapse TB patients on ART during TB treatment</b>                                                                                                                           | Improved quality of TB/HIV program            | Outcomes |
| <b>Percentage of new and relapse cases that were notified and treated among the estimated number of incident TB cases in the same year (all forms of TB bacteriologically confirmed plus clinically diagnosed)</b> | Improved TB treatment success                 | Outcomes |
| <b>Percentage of notified cases of bacteriologically confirmed, drug resistant RR-TB and/or MDR-TB as a % of all estimated Rifampicin-resistant TB and/or MDR-TB cases</b>                                         | Improved quality of MDR-TB program            | Outcomes |
| <b>Percentage of notified cases of bacteriologically confirmed, drug resistant RR-TB and/or MDR-TB as a % of all estimated Rifampicin-resistant TB and/or MDR-TB cases</b>                                         | Improved quality and coverage of TB diagnosis | Outcomes |
| <b>Percentage of people living with HIV in care (including PMTCT) who are screened for TB in HIV care or treatment settings</b>                                                                                    | Improved quality of TB/HIV program            | Outcomes |
| <b>Percentage of people living with HIV newly enrolled in HIV care started on TB preventive therapy</b>                                                                                                            | Improved quality of TB/HIV program            | Outcomes |
| <b>Percentage of registered new and relapse TB patients tested for HIV at diagnosis</b>                                                                                                                            | Improved quality of TB/HIV program            | Outcomes |
| <b>Percentage of TB cases, all forms (bacteriologically confirmed plus clinically diagnosed) successfully</b>                                                                                                      | Improved TB treatment success                 | Outcomes |

|                                                                                                                                                                                                                                             |                                                                                       |            |
|---------------------------------------------------------------------------------------------------------------------------------------------------------------------------------------------------------------------------------------------|---------------------------------------------------------------------------------------|------------|
| <b>treated (cured plus treatment completed) among all TB cases registered for treatment during a specified period, new and relapse cases</b>                                                                                                |                                                                                       |            |
| <b>Percentage of TB patients with DST result for at least Rifampicin among the total number of notified (new and retreatment) cases in the same year</b>                                                                                    | Improved quality of MDR-TB program                                                    | Outcomes   |
| <b>TB treatment coverage: Percentage of new and relapse cases that were notified and treated among the estimated number of incident TB cases in the same year (all forms of TB – bacteriologically confirmed plus clinically diagnosed)</b> | Improved TB treatment coverage                                                        | Outcomes   |
| <b>TB treatment success - all forms (bacteriologically confirmed plus clinically diagnosed, new and relapse cases)</b>                                                                                                                      | Improved TB treatment success                                                         | Outcomes   |
| <b>Diagnostic tests performed</b>                                                                                                                                                                                                           | Improved case detection and notification rates, including drug-susceptible and MDR-TB | Outputs    |
| <b>Isoniazid doses distributed</b>                                                                                                                                                                                                          | Improved adherence to TB drugs                                                        | Outputs    |
| <b>Number of cases with RR-TB and/or MDR-TB that began second-line treatment</b>                                                                                                                                                            | Improved case detection and notification rates, including drug-susceptible and MDR-TB | Outputs    |
| <b>Number of children &lt; 5 in contact with TB patients who began IPT</b>                                                                                                                                                                  | Improved uptake of TB preventive therapy                                              | Outputs    |
| <b>Number of notified cases of all forms of TB - (i.e. bacteriologically confirmed + clinically diagnosed), includes new and relapse cases</b>                                                                                              | Improved case detection and notification rates, including drug-susceptible and MDR-TB | Outputs    |
| <b>Number of patients registered on DOTS</b>                                                                                                                                                                                                | Improved adherence to TB drugs                                                        | Outputs    |
| <b>Number of TB cases with RR-TB and/or MDR-TB notified (MDR-TB-2(M))</b>                                                                                                                                                                   | Improved case detection and notification rates, including drug-susceptible and MDR-TB | Outputs    |
| <b>Percentage of people living with HIV in care (including PMTCT) who are screened for TB in HIV care or treatment settings at last visit</b>                                                                                               | Increased screening and diagnosis of TB/HIV                                           | Outputs    |
| <b>Percentage of registered new and relapse TB patients tested for HIV at diagnosis</b>                                                                                                                                                     | Increased screening and diagnosis of TB/HIV                                           | Outputs    |
| <b>Proportion of patients who complete treatment on directly observed therapy (DOTS) within 12 months</b>                                                                                                                                   | Improved adherence to TB drugs                                                        | Outputs    |
| <b>Rifampicin doses distributed</b>                                                                                                                                                                                                         | Improved adherence to TB drugs                                                        | Outputs    |
| <b>Second-line doses distributed</b>                                                                                                                                                                                                        | Improved adherence to TB drugs                                                        | Outputs    |
| <b>Percentage of laboratories showing adequate performance in external quality assurance for smear microscopy among the total number of laboratories that undertake smear microscopy</b>                                                    | Unselected                                                                            | Unselected |

## MALARIA

## Diagram

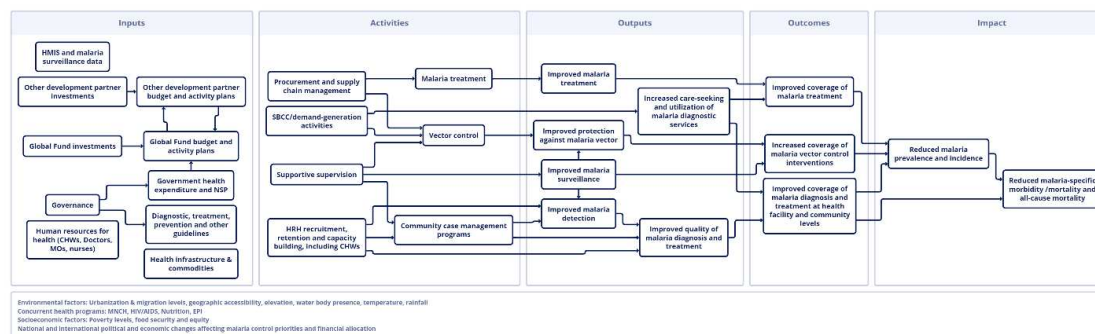

## List of Indicators and Elements

| Indicator                                                                                                                                                                                                               | Measurement of                                                       | Level      |
|-------------------------------------------------------------------------------------------------------------------------------------------------------------------------------------------------------------------------|----------------------------------------------------------------------|------------|
| <b>Distribution of health workers</b>                                                                                                                                                                                   | HRH recruitment, retention and capacity building, including CHWs     | Activities |
| <b>LLINs and associated commodities available and distributed to districts</b>                                                                                                                                          | Vector control                                                       | Activities |
| <b>Number of demand-generation activities</b>                                                                                                                                                                           | SBCC/demand-generation activities                                    | Activities |
| <b>Proportion HCW and CHW trained or retrained in malaria diagnosis and treatment in prior 2 years</b>                                                                                                                  | HRH recruitment, retention and capacity building, including CHWs     | Activities |
| <b>Annual parasite incidence: Confirmed malaria cases (microscopy or rapid diagnostic test): rate per 1,000 persons per year (Elimination settings)</b>                                                                 | Reduced malaria prevalence and incidence                             | Impact     |
| <b>Confirmed malaria cases (microscopy or RDT) rate/1000/yr</b>                                                                                                                                                         | Reduced malaria prevalence and incidence                             | Impact     |
| <b>Malaria case fatality ratio</b>                                                                                                                                                                                      | Reduced malaria-specific morbidity/mortality and all-cause mortality | Impact     |
| <b>Malaria test positivity rate</b>                                                                                                                                                                                     | Reduced malaria prevalence and incidence                             | Impact     |
| <b>Number of active foci of malaria</b>                                                                                                                                                                                 | Reduced malaria-specific morbidity/mortality and all-cause mortality | Impact     |
| <b>Percentage of deaths registered (as reported by civil or sample registration systems, hospitals, community-based reporting systems) among the total estimated deaths for the same period and geographical region</b> | Reduced malaria-specific morbidity/mortality and all-cause mortality | Impact     |

|                                                                                                                           |                                                                       |        |
|---------------------------------------------------------------------------------------------------------------------------|-----------------------------------------------------------------------|--------|
| <b>Plasmodium falciparum or vivax parasite rate per 10,000 population</b>                                                 | Reduced malaria-specific morbidity /mortality and all-cause mortality | Impact |
| <b>Proportion of children 6-59 months with malaria infection</b>                                                          | Reduced malaria prevalence and incidence                              | Impact |
| <b>Reported malaria cases (presumed and confirmed)</b>                                                                    | Reduced malaria-specific morbidity /mortality and all-cause mortality | Impact |
| <b>The number of maternal deaths per 100,000 live births (MMR)</b>                                                        | Reduced malaria-specific morbidity /mortality and all-cause mortality | Impact |
| <b>Under-5 mortality rate per 1,000 live births</b>                                                                       | Reduced malaria-specific morbidity /mortality and all-cause mortality | Impact |
| <b>Amount (\$) budgeted and expenditure by Global Fund on program management</b>                                          | Global Fund investments                                               | Inputs |
| <b>Amount (\$) budgeted and expenditure for vector control interventions and activities</b>                               | Government health expenditure and NSP                                 | Inputs |
| <b>Amount (US\$) budgeted and expenditure on case management interventions and activities</b>                             | Government health expenditure and NSP                                 | Inputs |
| <b>Amount (US\$) budgeted and expenditure on other interventions and activities</b>                                       | Government health expenditure and NSP                                 | Inputs |
| <b>Amount (US\$) budgeted and expenditure on RSSH interventions and activities</b>                                        | Global Fund investments                                               | Inputs |
| <b>Amount (US\$) budgeted by Global Fund on specific interventions and activities</b>                                     | Global Fund investments                                               | Inputs |
| <b>Amount (US\$) disbursed by Global Fund to PRs</b>                                                                      | Global Fund investments                                               | Inputs |
| <b>Amount (US\$) funds invested by Global Fund</b>                                                                        | Global Fund investments                                               | Inputs |
| <b>Amount of funding spent on program activities</b>                                                                      | Diagnostic, treatment, prevention and other guidelines                | Inputs |
| <b>Availability of human resources</b>                                                                                    | Human resources for health (CHWs, Doctors, MOs, nurses)               | Inputs |
| <b>Changes to policies and procedures</b>                                                                                 | Diagnostic, treatment, prevention and other guidelines                | Inputs |
| <b>Global Fund investments for malaria as a fraction of total health expenditure for malaria</b>                          | Global Fund investments                                               | Inputs |
| <b>Government expenditure on health as percentage of general government expenditure</b>                                   | Diagnostic, treatment, prevention and other guidelines                | Inputs |
| <b>Number of graduates from health workforce training institutions during the last academic year per 1,000 population</b> | Human resources for health (CHWs, Doctors, MOs, nurses)               | Inputs |
| <b>Number of health facilities per 10,000 population</b>                                                                  | Health infrastructure & commodities                                   | Inputs |

|                                                                                                                                                                                   |                                                                                              |          |
|-----------------------------------------------------------------------------------------------------------------------------------------------------------------------------------|----------------------------------------------------------------------------------------------|----------|
| <b>Total health expenditure for malaria</b>                                                                                                                                       | Government health expenditure and NSP                                                        | Inputs   |
| <b>Percentage of children aged 3-59 months who received the full number of courses of seasonal malaria chemoprevention (3 or 4) per transmission season in the targeted areas</b> | Improved coverage of malaria diagnosis and treatment at health facility and community levels | Outcomes |
| <b>Proportion of children under 5 who slept under an ITN the previous night</b>                                                                                                   | Increased coverage of malaria vector control interventions                                   | Outcomes |
| <b>Proportion of confirmed malaria cases that received first-line antimalarial treatment at private sector sites</b>                                                              | Improved coverage of malaria diagnosis and treatment at health facility and community levels | Outcomes |
| <b>Proportion of confirmed malaria cases that received first-line antimalarial treatment in the community</b>                                                                     | Improved coverage of malaria diagnosis and treatment at health facility and community levels | Outcomes |
| <b>Proportion of households in targeted areas that received IRS</b>                                                                                                               | Increased coverage of malaria vector control interventions                                   | Outcomes |
| <b>Proportion of households reporting seeking care for malaria</b>                                                                                                                | Improved coverage of malaria diagnosis and treatment at health facility and community levels | Outcomes |
| <b>Proportion of households sprayed by IRS within the last 12 months</b>                                                                                                          | Increased coverage of malaria vector control interventions                                   | Outcomes |
| <b>Proportion of households with access to at least one method of vector control (LLINs or IRS)</b>                                                                               | Increased coverage of malaria vector control interventions                                   | Outcomes |
| <b>Proportion of households with at least one ITN for every two people</b>                                                                                                        | Increased coverage of malaria vector control interventions                                   | Outcomes |
| <b>Proportion of households with at least one ITN for every two people and/or sprayed by indoor residual spraying within the last 12 months</b>                                   | Increased coverage of malaria vector control interventions                                   | Outcomes |
| <b>Proportion of malaria cases (presumed and confirmed) that received first-line antimalarial treatment at public sector health facilities</b>                                    | Improved coverage of malaria diagnosis and treatment at health facility and community levels | Outcomes |
| <b>Proportion of malaria cases (presumed and confirmed) that received first-line antimalarial treatment in the community</b>                                                      | Improved coverage of malaria diagnosis and treatment at health facility and community levels | Outcomes |
| <b>Proportion of population protected by IRS within the last 12 months in areas targeted for IRS</b>                                                                              | Increased coverage of malaria vector control interventions                                   | Outcomes |

|                                                                                                                                                                  |                                                                                              |          |
|------------------------------------------------------------------------------------------------------------------------------------------------------------------|----------------------------------------------------------------------------------------------|----------|
| <b>Proportion of population with access to an ITN within their household</b>                                                                                     | Increased coverage of malaria vector control interventions                                   | Outcomes |
| <b>Proportion of pregnant women attending antenatal clinics who received three or more doses of intermittent preventive treatment for malaria</b>                | Improved coverage of malaria treatment                                                       | Outcomes |
| <b>Proportion of suspected malaria cases that receive a parasitological test at public sector health facilities</b>                                              | Improved coverage of malaria diagnosis and treatment at health facility and community levels | Outcomes |
| <b>Proportion of suspected malaria cases that receive a parasitological test at private sector sites</b>                                                         | Improved coverage of malaria diagnosis and treatment at health facility and community levels | Outcomes |
| <b>Number of all suspected malaria cases that received a parasitological test at private sector sites</b>                                                        | Improved quality of malaria diagnosis and treatment                                          | Outputs  |
| <b>Number of all suspected malaria cases that received a parasitological test at public sector health facilities</b>                                             | Improved quality of malaria diagnosis and treatment                                          | Outputs  |
| <b>Number of all suspected malaria cases that received a parasitological test in the community</b>                                                               | Improved quality of malaria diagnosis and treatment                                          | Outputs  |
| <b>Number of children aged 3–59 months who received the full number of courses of SMC (3 or 4)</b>                                                               | Improved quality of malaria diagnosis and treatment                                          | Outputs  |
| <b>Number of confirmed malaria cases treated that received first-line antimalarial treatment according to national policy at public sector health facilities</b> | Improved quality of malaria diagnosis and treatment                                          | Outputs  |
| <b>Number of confirmed malaria cases treated that received first-line antimalarial treatment in the community</b>                                                | Improved quality of malaria diagnosis and treatment                                          | Outputs  |
| <b>Number of confirmed malaria cases treated that received first-line antimalarial treatment according to national policy at private sector sites</b>            | Improved quality of malaria diagnosis and treatment                                          | Outputs  |
| <b>Number of first line anti-malarial doses distributed to patients</b>                                                                                          | Improved quality of malaria diagnosis and treatment                                          | Outputs  |
| <b>Number of households in targeted areas that received spraying IRS</b>                                                                                         | Improved protection against malaria vector                                                   | Outputs  |
| <b>Number of LLINS delivered to households through mass campaigns or continuous distribution</b>                                                                 | Improved protection against malaria vector                                                   | Outputs  |
| <b>Number of LLINs distributed to at-risk populations through mass campaigns</b>                                                                                 | Improved protection against malaria vector                                                   | Outputs  |
| <b>Number of LLINs distributed to targeted risk groups through continuous distribution</b>                                                                       | Improved protection against malaria vector                                                   | Outputs  |
| <b>Number of malaria cases (presumed and confirmed) that received first-line anti-malarial treatment at public sector health facilities</b>                      | Improved quality of malaria diagnosis and treatment                                          | Outputs  |
| <b>Number of people attending a health facility or CHW</b>                                                                                                       | Increased care-seeking and utilization of malaria diagnostic services                        | Outputs  |



|                                                                                                                                                         |                                                     |         |
|---------------------------------------------------------------------------------------------------------------------------------------------------------|-----------------------------------------------------|---------|
| <b>Number of pregnant women attending antenatal clinics who received three or more doses of intermittent preventive therapy for malaria</b>             | Improved malaria treatment                          | Outputs |
| <b>Percentage of confirmed cases fully investigated and classified</b>                                                                                  | Improved malaria detection                          | Outputs |
| <b>Percentage of confirmed cases fully investigated and classified (among country-specific high risk groups and populations with occupational risk)</b> | Improved malaria detection                          | Outputs |
| <b>Percentage of existing ITNs used the previous night</b>                                                                                              | Improved protection against malaria vector          | Outputs |
| <b>Percentage of facilities with essential medicines and lifesaving commodities in stock</b>                                                            | Improved quality of malaria diagnosis and treatment | Outputs |
| <b>Percentage of HMIS or other routine reporting units submitting timely reports according to national guidelines</b>                                   | Improved malaria surveillance                       | Outputs |
| <b>Percentage of suspected malaria cases (presumed and confirmed) that receive first-line anti-malaria treatment</b>                                    | Improved quality of malaria diagnosis and treatment | Outputs |
| <b>Proportion of all suspected malaria cases that receive a parasitological test</b>                                                                    | Improved quality of malaria diagnosis and treatment | Outputs |
| <b>Proportion of children under 5 who slept under an ITN the previous night</b>                                                                         | Improved protection against malaria vector          | Outputs |
| <b>Proportion of CHWs with stock-outs of ACTs and RDTs</b>                                                                                              | Improved malaria detection                          | Outputs |
| <b>Proportion of health facilities without stock-outs of key commodities</b>                                                                            | Improved malaria detection                          | Outputs |
| <b>Proportion of population that slept under an ITN the previous night</b>                                                                              | Improved protection against malaria vector          | Outputs |
| <b>Proportion of population using an ITN among those with access to an ITN</b>                                                                          | Improved protection against malaria vector          | Outputs |
| <b>Proportion of pregnant women who slept under an ITN the previous night</b>                                                                           | Improved protection against malaria vector          | Outputs |
| <b>Proportion of suspected malaria cases that receive a parasitological test in the community</b>                                                       | Improved quality of malaria diagnosis and treatment | Outputs |
