# Supplementary material for: Bringing a health systems modelling approach to complex evaluations: multicountry applications in HIV, TB and malaria
Source: PubMed Central journal article supplement — BMJ Glob Health. 2020 Nov 3;5(11):e002441. doi: 10.1136/bmjgh-2020-002441 (PMC7640497; doi:10.1136/bmjgh-2020-002441), 2020-11-03
Supplement: bmjgh-2020-002441supp003.pdf [file bmjgh-2020-002441supp003.pdf]

## APPENDIX 4. MODEL CODE AND EXAMPLE EQUATION

We developed the model code using R version. The code is hosted in a publicly-available repository located at [https://github.com/ihmeuw/gf/tree/develop/impact\\_evaluation](https://github.com/ihmeuw/gf/tree/develop/impact_evaluation). The table below indicates the URL for the script that contains the equations that determine the model objects.

| Model Name                | URL for model code                                                                                                                                                                                      |
|---------------------------|---------------------------------------------------------------------------------------------------------------------------------------------------------------------------------------------------------|
| DRC Malaria (first half)  | <a href="https://github.com/ihmeuw/gf/blob/develop/impact_evaluation/drc/models/drc_malaria6.r">https://github.com/ihmeuw/gf/blob/develop/impact_evaluation/drc/models/drc_malaria6.r</a>               |
| DRC Malaria (second half) | <a href="https://github.com/ihmeuw/gf/blob/develop/impact_evaluation/drc/models/drc_malaria_impact4.r">https://github.com/ihmeuw/gf/blob/develop/impact_evaluation/drc/models/drc_malaria_impact4.r</a> |
| Guatemala TB              | <a href="https://github.com/ihmeuw/gf/blob/develop/impact_evaluation/gtm/models/gtm_tb_pub.R">https://github.com/ihmeuw/gf/blob/develop/impact_evaluation/gtm/models/gtm_tb_pub.R</a>                   |
| Senegal TB                | <a href="https://github.com/ihmeuw/gf/blob/develop/impact_evaluation/sen/models/sen_tb_model1.R">https://github.com/ihmeuw/gf/blob/develop/impact_evaluation/sen/models/sen_tb_model1.R</a>             |

The general form for equations in the model is a Bayesian structural equation model made up of linear regression equations with correlated error terms. The equations are fit using either gamma priors(1,1) or normal priors (mean 0 and precision 0.01) for each term. The code referenced in the table above contains the equations that determine each model. We provide an example below to assist the reader in translating between the equations from a narrative form to the code. The regression equations are run in parallel for each health zone.

### Narrative form of Equation 1 from DRC model

ITNs Received (#)  $\sim$  intercept +  $\beta_1$  \* Lag of ITN mass distribution (\$) by Global Fund +  $\beta_2$  \* Lag of ITN continuous distribution (\$) by Global Fund +  $\beta_3$  \* Lag of ITN (\$) from other donors +  $\beta_4$  \* Date +  $\beta_5$  \* ITN Reporting Completeness

### Coded form of Equation 1 from DRC model

```
ITN_received_cumulative ~ prior("dgamma(1,1)")*lag_exp_M1_1_cumulative
+ prior("dgamma(1,1)")*lag_exp_M1_2_cumulative +
prior("dgamma(1,1)")*lag_other_dah_M1_1_cumulative + date +
completeness_ITN_received
```
