# Supplementary material for: Bringing a health systems modelling approach to complex evaluations: multicountry applications in HIV, TB and malaria
Source: PubMed Central journal article supplement — BMJ Glob Health. 2020 Nov 3;5(11):e002441. doi: 10.1136/bmjgh-2020-002441 (PMC7640497; doi:10.1136/bmjgh-2020-002441), 2020-11-03
Supplement: bmjgh-2020-002441supp004.pdf [file bmjgh-2020-002441supp004.pdf]

## APPENDIX 3. INDICATORS USED IN EACH MODEL

TABLE 1. DRC-MALARIA

| Group      | Label in Diagram            | Definition                                                                                                                                      |
|------------|-----------------------------|-------------------------------------------------------------------------------------------------------------------------------------------------|
| Inputs     | Lag of ITN Mass GF (\$)     | Global Fund expenditure on ITN mass campaigns, ("lag" meaning six months prior to activities indicators)                                        |
| Inputs     | Lag of ITN Cont. GF (\$)    | Global Fund expenditure on ITN continuous distribution, ("lag" meaning six months prior to activities indicators)                               |
| Inputs     | Lag of ITN Other (\$)       | Other donor disbursement on ITN distribution, ("lag" meaning six months prior to activities indicators)                                         |
| Inputs     | Lag of Fac. Tx GF (\$)      | Global Fund expenditure on facility-based case management of malaria, ("lag" meaning six months prior to activities indicators)                 |
| Inputs     | Lag of Case Mgmt Other (\$) | Other donor disbursement on facility-based case management of malaria, ("lag" meaning six months prior to activities indicators)                |
| Inputs     | Lag of iCCM GF (\$)         | Global Fund expenditure on integrated community case management, ("lag" meaning six months prior to activities indicators)                      |
| Inputs     | Lag of iCCM Other (\$)      | Other donor disbursement on integrated community case management, ("lag" meaning six months prior to activities indicators)                     |
| Inputs     | Lag of GHE (\$)             | Government health expenditure on malaria in general, ("lag" meaning six months prior to activities indicators)                                  |
| Inputs     | Lag of Sev. Tx GF (\$)      | Global Fund expenditure on facility-base case management of severe malaria, ("lag" meaning six months prior to activities indicators)           |
| Inputs     | Lag of IPTp GF (\$)         | Global Fund expenditure on intermittent preventive treatment during pregnancy (IPTp), ("lag" meaning six months prior to activities indicators) |
| Activities | ITNs Rec. (#)               | Number of insecticide-treated nets received (i.e. shipped from central to health zone level)                                                    |

|            |                    |                                                                                                                         |
|------------|--------------------|-------------------------------------------------------------------------------------------------------------------------|
| Activities | RDTs Rec. (#)      | Number of rapid diagnostic tests received (i.e. shipped from central to health zone level)                              |
| Activities | ACTs Rec. (#)      | Number of individual units of artemisinin combination therapy received (i.e. shipped from central to health zone level) |
| Outputs    | ITNs Dist. (#)     | Number of insecticide-treated nets distributed (i.e. given to people)                                                   |
| Outputs    | RDTs Used (#)      | Number of rapid diagnostic tests conducted                                                                              |
| Outputs    | Pat.'s Tx iCCM (#) | Number of patients with malaria treated in community care settings                                                      |
| Outputs    | Pat.'s Tx (#)      | Number of patients with uncomplicated malaria treated in facilities                                                     |
| Outputs    | Sev. Tx (#)        | Number of patients with severe malaria treated in facilities                                                            |
| Outputs    | SP in ANC (#)      | Number of patients treated with sulfadoxine-pyrimethamine (SP) in antenatal care (ANC) (any visit)                      |
| Outcomes   | iCCM Tx. Cvg.      | Proportion of suspected cases of malaria treated in community care settings                                             |
| Outcomes   | Tx Cvg. (mild)     | Proportion of population-level cases of uncomplicated malaria treated with effective antimalarials                      |
| Outcomes   | RDT Cvg.           | Proportion of population-level cases of malaria tested with rapid diagnostic tests                                      |
| Outcomes   | Tx. Cvg. (severe)  | Proportion of population-level cases of severe malaria treated with effective antimalarials                             |
| Outcomes   | ITN Cvg.           | Proportion of population who slept under insecticide-treated nets in the previous night                                 |
| Outcomes   | IPTp Cvg.          | Proportion of antenatal care visits (1st visit) in which sulfadoxine-pyrimethamine was administered                     |

TABLE 2. GUATEMALA-TB

| Group      | Label in Diagram          | Definition                                                                                                                                                             |
|------------|---------------------------|------------------------------------------------------------------------------------------------------------------------------------------------------------------------|
| Inputs     | GF TB Exp.                | Global Fund expenditure on tuberculosis, excluding MDR-TB and TB/HIV modules, cumulatively summed since 2009.*                                                         |
| Inputs     | GF MDR-TB Exp.            | Global Fund expenditure on multidrug-resistant tuberculosis, cumulatively summed since 2009.*                                                                          |
| Inputs     | GF TB/HIV Exp.            | Global Fund expenditure on HIV/TB, cumulatively summed since 2009.*                                                                                                    |
| Inputs     | GHE TB Exp.               | Government health expenditure on tuberculosis, cumulatively summed since 2009.                                                                                         |
| Inputs     | Other DAH TB Exp.         | Development assistance from other donors for tuberculosis, cumulatively summed since 2009.                                                                             |
| Activities | First-line drugs dist.    | Drugs distributed which are first-line for the treatment of drug-susceptible TB (rifampicin, isoniazid, pyrazinamide, and ethambutol), cumulatively summed since 2009. |
| Activities | Second-line drugs dist.   | TB drugs distributed which are not in the first-line category above. This category includes drugs used for treatment of MDR-TB, cumulatively summed since 2009.        |
| Activities | Cases detected via ACF    | Cases detected via active case finding by outreach workers, cumulatively summed since 2009 (activities did not start until 2017 for this variable)                     |
| Activities | GeneXpert testing for MDR | Number of tuberculosis patients tested with Xpert MTB/RIF, cumulatively summed since 2009.                                                                             |

|            |                                       |                                                                                                                            |
|------------|---------------------------------------|----------------------------------------------------------------------------------------------------------------------------|
| Activities | TB patients tested for HIV            | Number of tuberculosis patients tested for HIV, cumulatively summed since 2009.                                            |
| Outputs    | Cases Started Tx.                     | Persons with tuberculosis started on treatment, not counting MDR-TB or HIV/TB, cumulatively summed since 2009.             |
| Outputs    | Cases Notified                        | Number of persons with all-forms of TB notified to surveillance, cumulatively summed since 2009.                           |
| Outputs    | Children <5 referred for TB screening | Children under 5 evaluated for TB screening through household contact investigation, cumulatively summed since 2009.       |
| Outputs    | MDR Cases Started Tx.                 | Persons with multidrug-resistant TB started on treatment, cumulatively summed since 2009.                                  |
| Outputs    | HIV/TB Cases Notified                 | Persons with HIV/TB co-infection notified to surveillance, cumulatively summed since 2009.                                 |
| Outputs    | Cases Notified in Prisons             | Persons who reside in prisons and have TB notified, cumulatively summed since 2009.                                        |
| Outcomes   | Case notification rate                | Persons notified with all-forms of TB per 100,000 population, quarterly since 2009.                                        |
| Outcomes   | Tx. success rate                      | Proportion of persons with drug-susceptible TB who complete treatment or have documentation of cure, quarterly since 2009. |
| Outcomes   | Prop. HIV/TB cases treated            | Proportion of HIV/TB cases notified who are started on treatment, quarterly since 2009.                                    |

|          |                                |                                                                                                                            |
|----------|--------------------------------|----------------------------------------------------------------------------------------------------------------------------|
| Outcomes | HIV/TB tx. Success rate        | Proportion of persons with HIV/TB co-infection who complete treatment or have documentation of cure, quarterly since 2009. |
| Outcomes | Prop. MDR-TB Cases Treated     | Proportion of MDR-TB cases notified who are started on treatment, quarterly since 2009.                                    |
| Outcomes | Children <5 started IPT        | Children in contact with tuberculosis who started IPT, cumulatively summed since 2009.                                     |
| Outcomes | Prop. Patients receiving DST   | Proportion of persons with TB who were tested by WHO approved rapid diagnostic test (Xpert MTB/RIF), quarterly since 2009. |
| Outcomes | Prop. cases in prisons treated | Proportion of persons residing in prison who were found to have TB who were treated, quarterly since 2009.                 |

TABLE 3. SENEGAL-TB

| Group  | Label in Diagram | Definition                                                       |
|--------|------------------|------------------------------------------------------------------|
| Inputs | GF TB-HIV Exp    | Global Fund spending on TB-HIV                                   |
| Inputs | GF TB Comm Exp   | Global Fund spending on TB Community Care                        |
| Inputs | GF Case D&D Exp  | Global Fund spending on TB case detection and diagnosis          |
| Inputs | Oth Case D&D Exp | Other development assistance for TB case detection and diagnosis |
| Inputs | GF MDR-TB Exp    | Global Fund spending on TB-MDR                                   |

|            |                        |                                                                                                   |
|------------|------------------------|---------------------------------------------------------------------------------------------------|
| Inputs     | Oth MDR-TB Exp         | Other development assistance for TB-MDR                                                           |
| Activities | No. TB w/ HIV          | TB patients diagnosed with HIV                                                                    |
| Activities | No. social mobil       | Number of social mobilizations                                                                    |
| Activities | No. home visits        | Number of home visits to identify presumed TB cases (people with cough longer than 2 weeks)       |
| Activities | No. radio bcsts        | Number of radio broadcasts                                                                        |
| Activities | Lab prf rate           | Laboratory performance rate (percentage deemed high quality)                                      |
| Activities | No. GeneXpert tests    | Number of patients tested with GeneXpert                                                          |
| Outputs    | No. TB-HIV on ARV      | TB/HIV patients on ARVs                                                                           |
| Outputs    | No. child ref          | Number of child TB contacts referred to care                                                      |
| Outputs    | No. ppl w/ cough ref   | Number of people with cough longer than 2 weeks referred to care                                  |
| Outputs    | No. TB dx in oth ways  | Cases identified through other means (Total cases identified minus cases identified by GeneXpert) |
| Outputs    | No. TB dx by GeneXpert | Total cases diagnosed by GeneXpert                                                                |
| Outputs    | No. MDR-TB cases dx    | Number of MDR-TB cases                                                                            |
| Outputs    | No. Tx First-line      | Total number of TB cases treated (first-line)                                                     |
| Outcomes   | TB Tx Success Rate     | TB treatment success rate                                                                         |
| Outcomes   | No. child on IPT       | Chemoprevention for healthy children, ages 0-5                                                    |

| Outcomes | No. MDR-TB Cured | Number of cases of MDR-TB cured |
|----------|------------------|---------------------------------|
|----------|------------------|---------------------------------|
